# Supplementary material for: Critical Role of Klf5 in Regulating Gene Expression during Post-Eyelid Opening Maturation of Mouse Corneas
Source: PLoS One. 2012 Sep 14;7(9):e44771. doi: 10.1371/journal.pone.0044771 (PMC3443110; doi:10.1371/journal.pone.0044771)
Supplement: Table S4 — Most downregulated genes in PN56 Klf5 CN corneas. (XLS) [file pone.0044771.s007.xls]

## Sheet: Sheet1
Gene symbol	Description	mean of log intensities for WT	mean of log intensities for KLF5CN	Fold Difference
Klf5	Kruppel-like factor 5	10.2228	4.75429	0.0225847
Gldc	glycine decarboxylase	7.88185	4.72919	0.112449
Ppp1r3c	protein phosphatase 1, regulatory (inhibitor) subunit 3C	10.5624	7.62766	0.130785
Gkn1	gastrokine 1	7.5046	4.58782	0.132422
Cyp24a1	cytochrome P450, family 24, subfamily a, polypeptide 1	7.75315	5.05512	0.154103
Enpep	glutamyl aminopeptidase	9.3799	6.72451	0.158726
Klk11	kallikrein related-peptidase 11	6.7096	4.10722	0.164667
Folr1	folate receptor 1 (adult)	7.79085	5.43455	0.195291
Cd55	CD55 antigen	6.58346	4.25072	0.198507
Dsg1a	desmoglein 1 alpha	11.3267	9.05839	0.20757
Trpm3	transient receptor potential cation channel, subfamily M, member 3	7.20465	4.98277	0.214362
Il1f5	interleukin 1 family, member 5 (delta)	7.78167	5.57586	0.216763
Pygl	liver glycogen phosphorylase	9.93045	7.74161	0.219328
Ldlr	low density lipoprotein receptor	6.62754	4.50998	0.230436
Lect1	leukocyte cell derived chemotaxin 1	7.83346	5.72121	0.231286
Ces3	carboxylesterase 3	10.1128	8.03937	0.237586
Fam184b	family with sequence similarity 184, member B	7.55604	5.48332	0.237711
Mab21l1	mab-21-like 1 (C. elegans)	8.50981	6.44819	0.239547
Paqr5	progestin and adipoQ receptor family member V	8.0806	6.03461	0.242156
Dlg2	discs, large homolog 2 (Drosophila)	7.78734	5.74854	0.243366
Sorbs2	sorbin and SH3 domain containing 2	9.44882	7.41229	0.243749
Myo6	myosin VI	7.24083	5.21024	0.244755
Tkt	transketolase	9.64747	7.62329	0.245845
Slc14a1	solute carrier family 14 (urea transporter), member 1	9.34212	7.31816	0.245882
Col4a3	collagen, type IV, alpha 3	8.90725	6.89473	0.24784
Aldh1a1	aldehyde dehydrogenase family 1, subfamily A1	10.1204	8.11241	0.248614
Vgll3	vestigial like 3 (Drosophila)	7.80609	5.89176	0.265295
Abcc9	ATP-binding cassette, sub-family C (CFTR/MRP), member 9	6.77528	4.86227	0.265538
Crygb	crystallin, gamma B	8.28996	6.42598	0.274717
Dkk1	dickkopf homolog 1 (Xenopus laevis)	7.10533	5.25625	0.277569
Ano9	anoctamin 9	6.61705	4.76967	0.277897
Kif26a	kinesin family member 26A	6.70607	4.87317	0.2807
Prss32	protease, serine, 32	8.46444	6.67166	0.288615
Slc4a11	solute carrier family 4, sodium bicarbonate transporter-like, member 11	9.39905	7.63546	0.294514
Cryaa	crystallin, alpha A	8.39352	6.6498	0.298599
Osbpl6	oxysterol binding protein-like 6	6.49973	4.76922	0.301345
Prkcb	protein kinase C, beta	8.47859	6.76916	0.305781
Fxyd4	FXYD domain-containing ion transport regulator 4	7.29488	5.59456	0.307718
Ly6g6c	lymphocyte antigen 6 complex, locus G6C	11.1836	9.50304	0.311966
Cryba1	crystallin, beta A1	8.54931	6.87581	0.313492
Prom2	prominin 2	8.18064	6.53774	0.320212
Lgals7	lectin, galactose binding, soluble 7	6.86145	5.22238	0.321063
Smoc1	SPARC related modular calcium binding 1	7.97205	6.34166	0.323001
Echdc3	enoyl Coenzyme A hydratase domain containing 3	9.63174	8.00943	0.324815
Homer2	homer homolog 2 (Drosophila)	11.0649	9.44415	0.325155
Lce3c	late cornified envelope 3C	8.11805	6.4986	0.32546
Crygs	crystallin, gamma S	8.7757	7.15806	0.325868
Stk35	serine/threonine kinase 35	9.36783	7.75046	0.325929
Taf9b	TAF9B RNA polymerase II, TATA box binding protein (TBP)-associated factor	7.87762	6.26696	0.327449
Fjx1	four jointed box 1 (Drosophila)	7.09574	5.48992	0.328549
Col4a4	collagen, type IV, alpha 4	9.88615	8.28722	0.330122
Npr3	natriuretic peptide receptor 3	8.79325	7.19521	0.330325
Rasgrf1	RAS protein-specific guanine nucleotide-releasing factor 1	8.63206	7.04807	0.333558
Npnt	nephronectin	6.88658	5.31636	0.336757
Chst10	carbohydrate sulfotransferase 10	7.15552	5.59737	0.339586
Tyrp1	tyrosinase-related protein 1	7.42562	5.87282	0.340848
Crlf1	cytokine receptor-like factor 1	8.3661	6.81366	0.340933
Fam176a	family with sequence similarity 176, member A	8.94638	7.41435	0.34579
Rnf144b	ring finger protein 144B	7.83785	6.30654	0.345963
Abcg2	ATP-binding cassette, sub-family G (WHITE), member 2	7.62475	6.09698	0.346813
Tppp	tubulin polymerization promoting protein	7.57879	6.06194	0.349448
Sgk3	serum/glucocorticoid regulated kinase 3	9.03442	7.52758	0.351881
Polr3g	polymerase (RNA) III (DNA directed) polypeptide G	7.99201	6.49879	0.355219
Card14	caspase recruitment domain family, member 14	6.77276	5.2851	0.35659
Gyg	glycogenin	11.6315	10.1478	0.357548
Ndn	necdin	9.65676	8.18046	0.359409
Mblac2	metallo-beta-lactamase domain containing 2	7.08768	5.61854	0.361198
Slc39a8	solute carrier family 39 (metal ion transporter), member 8	9.9141	8.45942	0.364836
Emx2os	empty spiracles homolog 2 (Drosophila) opposite strand	7.30232	5.84825	0.36499
Paqr8	progestin and adipoQ receptor family member VIII	7.15809	5.71197	0.367007
Aldh1a7	aldehyde dehydrogenase family 1, subfamily A7	7.94015	6.49758	0.367911
Scd2	stearoyl-Coenzyme A desaturase 2	11.9573	10.5275	0.37119
Kprp	keratinocyte expressed, proline-rich	6.72391	5.29481	0.371362
Fgfbp3	fibroblast growth factor binding protein 3	7.80104	6.37227	0.371447
Ntn1	netrin 1	8.02558	6.60275	0.37298
Cd109	CD109 antigen	8.39765	6.98582	0.375835
Nrg1	neuregulin 1	7.26051	5.85861	0.37843
Lce3a	late cornified envelope 3A	10.1865	8.798	0.381972
Zfp385c	zinc finger protein 385C	7.82049	6.43594	0.383009
Cryba4	crystallin, beta A4	6.70723	5.32362	0.383259
Galnt4	UDP-N-acetyl-alpha-D-galactosamine:polypeptide N-acetylgalactosaminyltransferase 4	9.416	8.03468	0.383867
Cst6	cystatin E/M	7.55621	6.18004	0.38524
Ednrb	endothelin receptor type B	7.87259	6.5002	0.386251
Fam169a	family with sequence similarity 169, member A	9.5253	8.15822	0.387675
Npy	neuropeptide Y	11.2599	9.89609	0.38856
Sgk3	serum/glucocorticoid regulated kinase 3	10.0429	8.68903	0.391249
Pgap1	post-GPI attachment to proteins 1	7.60798	6.25897	0.392561
Frem2	Fras1 related extracellular matrix protein 2	7.87331	6.53307	0.394955
Col8a1	collagen, type VIII, alpha 1	6.46434	5.12525	0.39527
Ttc36	tetratricopeptide repeat domain 36	8.49249	7.15465	0.395613
Lynx1	Ly6/neurotoxin 1	9.5337	8.19601	0.395654
Tst	thiosulfate sulfurtransferase, mitochondrial	8.57231	7.24332	0.398047
Gal3st4	galactose-3-O-sulfotransferase 4	7.9501	6.63479	0.401839
Akr1c13	aldo-keto reductase family 1, member C13	8.6287	7.31532	0.402377
Crygd	crystallin, gamma D	6.88267	5.57072	0.402776
Cldn10	claudin 10	9.69656	8.38952	0.404149
Svip	small VCP/p97-interacting protein	9.29788	8.00722	0.408764
Rasl11b	RAS-like, family 11, member B	8.42881	7.13863	0.4089
Bnc1	basonuclin 1	10.6546	9.3653	0.409164
Rps4y2	ribosomal protein S4, Y-linked 2	9.79162	8.50242	0.409178
Bag2	BCL2-associated athanogene 2	9.02942	7.74542	0.410655
Slit2	slit homolog 2 (Drosophila)	9.27142	7.98906	0.411122
Usp46	ubiquitin specific peptidase 46	9.60198	8.32527	0.412736
Lamb1-1	laminin B1 subunit 1	7.55752	6.28086	0.41275
Gsta2	glutathione S-transferase, alpha 2 (Yc2)	11.0737	9.80078	0.413827
Rasef	RAS and EF hand domain containing	7.9954	6.73085	0.416229
Pla2g5	phospholipase A2, group V	7.14155	5.88175	0.417602
Gstt2	glutathione S-transferase, theta 2	6.86302	5.60473	0.418039
Trex2	three prime repair exonuclease 2	8.35456	7.11142	0.422452
Tspan6	tetraspanin 6	9.80261	8.56254	0.423352
Aacs	acetoacetyl-CoA synthetase	8.97962	7.74043	0.42361
Trim2	tripartite motif-containing 2	8.50163	7.26248	0.423622
Satb1	special AT-rich sequence binding protein 1	7.09849	5.86268	0.424604
Phyhip	phytanoyl-CoA hydroxylase interacting protein	8.50896	7.27549	0.425293
Fyttd1	forty-two-three domain containing 1	7.38632	6.15522	0.425993
Tmprss11d	transmembrane protease, serine 11d	8.73737	7.50944	0.42693
B3gntl1	UDP-GlcNAc:betaGal beta-1,3-N-acetylglucosaminyltransferase-like 1	8.36645	7.1389	0.427042
Dapl1	death associated protein-like 1	12.1325	10.905	0.427045
Plxna2	plexin A2	6.86915	5.64581	0.42829
Arf2	ADP-ribosylation factor 2	7.75823	6.54589	0.431568
Chchd7	coiled-coil-helix-coiled-coil-helix domain containing 7	8.81862	7.61108	0.433006
Snx6	sorting nexin 6	7.17045	5.96306	0.433051
Zfp772	zinc finger protein 772	6.87116	5.6642	0.43318
Pcyt1a	phosphate cytidylyltransferase 1, choline, alpha isoform	8.72323	7.51892	0.433977
Scrn3	secernin 3	6.4207	5.22171	0.43558
Krt78	keratin 78	9.14334	7.94498	0.43577
Esyt3	extended synaptotagmin-like protein 3	7.74374	6.54841	0.436687
Arntl	aryl hydrocarbon receptor nuclear translocator-like	7.96647	6.77149	0.436793
Pcdh8	protocadherin 8	7.22193	6.0297	0.437626
Pigc	phosphatidylinositol glycan anchor biosynthesis, class C	6.62886	5.43918	0.4384
Tmigd1	transmembrane and immunoglobulin domain containing 1	9.29952	8.11008	0.438473
Spon2	spondin 2, extracellular matrix protein	9.06623	7.87897	0.439136
Clip4	CAP-GLY domain containing linker protein family, member 4	8.50119	7.3157	0.439675
Ldlrap1	low density lipoprotein receptor adaptor protein 1	7.35054	6.16578	0.439898
Cryba2	crystallin, beta A2	7.39106	6.21043	0.441159
Gigyf2	GRB10 interacting GYF protein 2	6.62557	5.44517	0.441229
Slc46a2	solute carrier family 46, member 2	6.37023	5.19135	0.441694
Tcfap2b	transcription factor AP-2 beta	8.41201	7.24175	0.444341
Hs3st3b1	heparan sulfate (glucosamine) 3-O-sulfotransferase 3B1	7.7227	6.55304	0.444526
Cyp3a13	cytochrome P450, family 3, subfamily a, polypeptide 13	9.54584	8.37965	0.445597
Nrarp	Notch-regulated ankyrin repeat protein	10.3819	9.21952	0.446762
Dnajc21	DnaJ (Hsp40) homolog, subfamily C, member 21	8.17675	7.01467	0.446868
Ptprd	protein tyrosine phosphatase, receptor type, D	8.02519	6.87113	0.449359
Fermt3	fermitin family homolog 3 (Drosophila)	8.65814	7.50845	0.450722
Efcab6	EF-hand calcium binding domain 6	9.16765	8.02012	0.451397
Adh6b	alcohol dehydrogenase 6B (class V)	9.59471	8.44836	0.451767
Fhit	fragile histidine triad gene	6.54249	5.40096	0.453279
Ppfibp2	protein tyrosine phosphatase, receptor-type, F interacting protein, binding protein 2	9.37665	8.23781	0.454125
Mxra7	matrix-remodelling associated 7	7.731	6.60851	0.4593
Duox1	dual oxidase 1	6.58432	5.4621	0.459386
Slc19a2	solute carrier family 19 (thiamine transporter), member 2	11.0929	9.98008	0.462402
Scd1	stearoyl-Coenzyme A desaturase 1	9.06677	7.95508	0.462752
Fah	fumarylacetoacetate hydrolase	8.81819	7.7075	0.463073
Gpr68	G protein-coupled receptor 68	6.39315	5.28883	0.465122
Lrp12	low density lipoprotein-related protein 12	8.01953	6.91804	0.466035
Srpk2	serine/arginine-rich protein specific kinase 2	8.34373	7.24645	0.467397
Megf9	multiple EGF-like-domains 9	6.83	5.73383	0.467757
Cmbl	carboxymethylenebutenolidase-like (Pseudomonas)	6.83213	5.739	0.468743
Aldh6a1	aldehyde dehydrogenase family 6, subfamily A1	9.12167	8.02942	0.469029
Mttp	microsomal triglyceride transfer protein	6.83772	5.74693	0.469504
Il20rb	interleukin 20 receptor beta	8.32136	7.23308	0.470322
Omp	olfactory marker protein	6.57806	5.49407	0.471722
Emx2	empty spiracles homolog 2 (Drosophila)	8.5788	7.49705	0.472455
Rab27b	RAB27b, member RAS oncogene family	8.90953	7.82813	0.47257
Dsc3	desmocollin 3	9.89193	8.81116	0.472776
Aplp2	amyloid beta (A4) precursor-like protein 2	9.14685	8.06764	0.473288
Tppp3	tubulin polymerization-promoting protein family member 3	7.13686	6.05937	0.473853
Gpt	glutamic pyruvic transaminase, soluble	8.61545	7.5446	0.476038
Ppp1r12a	protein phosphatase 1, regulatory (inhibitor) subunit 12A	9.19995	8.13209	0.477026
Dock1	dedicator of cytokinesis 1	7.10452	6.03857	0.477658
Ttc7b	tetratricopeptide repeat domain 7B	7.2163	6.15132	0.477979
Cpd	carboxypeptidase D	9.90664	8.84206	0.478112
Serpinb2	serine (or cysteine) peptidase inhibitor, clade B, member 2	6.8644	5.80371	0.479403
Slc4a4	solute carrier family 4 (anion exchanger), member 4	8.80028	7.74161	0.480074
Tmem218	transmembrane protein 218	7.51244	6.45791	0.481454
Ndrg2	N-myc downstream regulated gene 2	7.44381	6.39028	0.481788
Pitx2	paired-like homeodomain transcription factor 2	8.07801	7.02585	0.482246
Zfhx3	zinc finger homeobox 3	6.49587	5.45114	0.484736
Lsamp	limbic system-associated membrane protein	7.08002	6.03574	0.484887
St8sia6	ST8 alpha-N-acetyl-neuraminide alpha-2,8-sialyltransferase 6	8.95542	7.91233	0.485287
Spnb3	spectrin beta 3	9.72397	8.68395	0.486321
Slc22a5	solute carrier family 22 (organic cation transporter), member 5	6.63559	5.59605	0.486483
Agpat3	1-acylglycerol-3-phosphate O-acyltransferase 3	9.2457	8.20656	0.486617
Ttc39b	tetratricopeptide repeat domain 39B	6.55167	5.51479	0.48738
Hrsp12	heat-responsive protein 12	8.19959	7.16317	0.487536
Enpp5	ectonucleotide pyrophosphatase/phosphodiesterase 5	8.45333	7.41803	0.487914
Nqo1	NAD(P)H dehydrogenase, quinone 1	8.24747	7.21228	0.487952
Sri	sorcin	9.13441	8.10206	0.488913
Sox21	SRY-box containing gene 21	7.17495	6.14645	0.49022
Mina	myc induced nuclear antigen	7.67095	6.64597	0.491417
Gpc6	glypican 6	8.20269	7.18104	0.492553
Zfp296	zinc finger protein 296	7.21538	6.19604	0.493342
Rrp9	RRP9, small subunit (SSU) processome component, homolog (yeast)	6.51883	5.50026	0.493605
Pot1a	protection of telomeres 1A	9.13583	8.11743	0.493664
Thbd	thrombomodulin	8.94609	7.92958	0.494311
Prkg1	protein kinase, cGMP-dependent, type I	7.92504	6.91154	0.495343
Xlr4c	X-linked lymphocyte-regulated 4C	7.31376	6.30202	0.495948
Fam48a	family with sequence similarity 48, member A	7.19263	6.18163	0.496202
Clic3	chloride intracellular channel 3	10.3151	9.3055	0.49667
Frmd4b	FERM domain containing 4B	7.00663	5.99748	0.496839
Rlbp1l1	retinaldehyde binding protein 1-like 1	7.01608	6.00698	0.496856
Ppp1r14c	protein phosphatase 1, regulatory (inhibitor) subunit 14c	9.52209	8.51361	0.49707
Slc22a18	solute carrier family 22 (organic cation transporter), member 18	7.34409	6.33633	0.497318
Rgs20	regulator of G-protein signaling 20	7.12502	6.11844	0.497725
Hmgcs1	3-hydroxy-3-methylglutaryl-Coenzyme A synthase 1	10.9724	9.96608	0.497821
Rapgef3	Rap guanine nucleotide exchange factor (GEF) 3	6.50927	5.50306	0.497852
Otud4	OTU domain containing 4	6.51996	5.51518	0.498346
Pdlim5	PDZ and LIM domain 5	8.79827	7.79484	0.498813
Gstm1	glutathione S-transferase, mu 1	7.82088	6.81792	0.498975
Nr4a2	nuclear receptor subfamily 4, group A, member 2	8.2937	7.29361	0.499969
