# Supplementary material for: Critical Role of Klf5 in Regulating Gene Expression during Post-Eyelid Opening Maturation of Mouse Corneas
Source: PLoS One. 2012 Sep 14;7(9):e44771. doi: 10.1371/journal.pone.0044771 (PMC3443110; doi:10.1371/journal.pone.0044771)
Supplement: Table S11 — Immune-related genes whose expression changes in Klf5 CN corneas. 107 of 368 immun/inflam genes were upregulated in PN56 and/or PN11 Klf5CN corneas, with only 7 genes downregulated. Entries in bold show the smaller number of genes affected in PN56 Klf4CN corneas. (XLSX) [file pone.0044771.s014.xlsx]

## Sheet: Sheet1
Supplemental Table 11. Immune-related genes whose expression changes in Klf5CN corneas. 107 of 368 immun/inflam genes were upregulated in PN56 and/or PN11 Klf5CN corneas. Only 7 were downregulated. Entries in bold show the smaller number of genes affected in PN56 Klf4CN corneas.
Increased in both PN11 and PN56 Klf5CN corneas		Increased only in PN11 Klf5CN corneas	Increased only in PN56 Klf5CN corneas
Alox5ap	Lbp	Btla	C1qa
BC013712	Lcp1	Ccl17	Cblb
C1qc	Lif	Ccl22	Chi3l3
C3	Ly86	Ccl5	Ctla4
C4b	Myo1f	Ccl7	Cxcl13
Ccl11	Oasl2	Ccr2	Enpp2
Ccl12	Olr1	Cfp	F2r
Ccl19	Ppbp	Clec4a2	Fcgrt
Ccl6	S1pr3	Clec4a2 /// Clec4b1	H2-Ob
Ccl8	Sash3	Cnr1	Igfbp4
Ccl9	Sbno2	Cnr2	Igh-6
Ccr1	Serpina3n	Csf3	Igj
Ccr5	Serpinb9	Cxcl1	Il18r1
Cd14	Tlr13	Cxcl14	Il2ra
Cd163	Tmem173	Cysltr1	Mefv
Clec4d	Tnfrsf1b	Dhx58	Nupr1
Clec4n	Tnfsf10	Dock2	Osm
Cxcl2	Was	Fas	Plscr1
Cxcl3		Gm106	Samhd1
Cxcl5		Hmox1	Slc7a2
Enpp1		Il1f6	Tlr1
Fcgr2b		Itgb6	Vav1
H2-Aa		Lst1	Vcam1
H2-Ab1		Ms4a2
H2-DMa		Mx1
H2-DMb1 /// H2-DMb2		Ngf	Decreased expression in Klf5CN corneas
H2-Q7		Oas1a	Aqp3 (PN11 only)
Hfe		Oas2	Cd40 (PN11 only)
Il13ra1		Oasl1	F3 (PN11 only)
Il1a		Orm1	Il20rb (PN11 only)
Il4ra		Pf4	Procr (PN11 only)
Il7r		Stab1	Cd55 (PN56 only)
Itgb2		Tnfaip8l2	Spon2(PN56 only)
